# Supplementary material for: Peripheral α2-β1 adrenergic interactions mediate the ghrelin response to brain urocortin 1 in rats
Source: PubMed Central journal article supplement — Psychoneuroendocrinology. Author manuscript; Available in PMC 2018 May 9. (PMC5942202; doi:10.1016/j.psyneuen.2014.09.003), 2014-09-16
Supplement: NIHMS964516-supplement-s1.pdf [file NIHMS964516-supplement-s1.pdf]

## Supplementary Materials 1

### ***Radioligand binding assay protocol***

For detection of  $\alpha_{1A}$ -adrenergic receptor (AR) activation, submaxillary gland samples of male Wistar rats were homogenized in modified Tris-HCl buffer (pH 7.4) using standard techniques, and aliquots of the prepared samples were incubated with 0.25 nM [ $^3\text{H}$ ] prazosin for 60 min at 25°C. Nonspecific binding was estimated in the presence of 10  $\mu\text{M}$  phentolamine (Michel et al., 1989). For detection of  $\alpha_{1B}$ -AR activation, liver samples of male Wistar rats were prepared in modified Tris-HCl buffer using standard techniques and aliquots of the sample/Tris-HCl homogenate were incubated with 0.25 nM [ $^3\text{H}$ ] prazosin for 60 min at 25°C. Nonspecific binding was estimated in the presence of 10  $\mu\text{M}$  phentolamine (Garcia-Sainz et al., 1992; Michel et al., 1989). For the  $\alpha_{2A}$ -AR binding assay, insect Sf9 cells expressing human recombinant  $\alpha_{2A}$ -AR were homogenized in modified Tris-HCl buffer and aliquots were incubated with 1 nM [ $^3\text{H}$ ] MK-912 for 60 min at 25°C. Nonspecific binding was estimated in the presence of 10  $\mu\text{M}$  WB-4101 (Uhlen et al., 1994). For  $\alpha_{2B}$ -AR, CHO-K1 cells stably transfected with a plasmid encoding human  $\alpha_{2B}$ -AR were homogenized in modified Tris-HCl buffer using standard techniques and aliquots were incubated with 2.5 nM [ $^3\text{H}$ ] rauwolscine for 60 min at 25°C. Nonspecific binding was estimated in the presence of 10  $\mu\text{M}$  prazosin (Uhlen et al., 1998). For  $\alpha_{2C}$ -AR, insect Sf9 cells expressing human recombinant  $\alpha_{2C}$ -AR were homogenized in modified Tris-HCl buffer and aliquot was incubated with 1 nM [ $^3\text{H}$ ] MK-912 for 60 min at 25°C. Nonspecific binding was estimated in the presence of 10  $\mu\text{M}$  WB-4101 (Uhlen et al., 1994). For  $\beta_1$ -AR, CHO-K1 cells expressing human recombinant  $\beta_1$ -AR were homogenized in modified Tris-HCl buffer and aliquots were incubated with 0.03 nM [ $^{125}\text{I}$ ] cyanopindolol for 120 min at 25°C. Nonspecific binding was estimated in the presence of 100  $\mu\text{M}$  S (-)-propranolol (Feve et al., 1994). For  $\beta_3$ -AR, HEK-293 cells expressing human  $\beta_3$ -AR expressed were used to prepare membranes in modified Tris-HCl buffer and aliquots were incubated with 0.5 nM [ $^{125}\text{I}$ ] iodocyanopindolol for 90 min at 25°C. Nonspecific binding was estimated in the presence of 1 mM alprenolol (Feve et al., 1994). All samples were filtered twice and assayed to determine radio ligand-specific binding. The half maximal inhibitory concentrations ( $\text{IC}_{50}$ ) values were determined by nonlinear, least-squares regression analysis using MathIQ™ statistical software (ID Business Solutions Ltd., Surrey, UK).

### **References**

- Feve, B., Elhadri, K., Quignard-Boulangé, A., Pairault, J., 1994. Transcriptional down-regulation by insulin of the beta 3-adrenergic receptor expression in 3T3-F442A adipocytes: a mechanism for repressing the cAMP signaling pathway. *Proc Natl Acad Sci U S A* 91, 5677-5681.
- Garcia-Sainz, J.A., Romero-Avila, M.T., Alcantara Hernandez, R., Macias-Silva, M., Olivares-Reyes, A., Gonzalez-Espinosa, C., 1992. Species heterogeneity of hepatic alpha 1-adrenoceptors: alpha 1A-, alpha 1B- and alpha 1C-subtypes. *Biochem Biophys Res Commun* 186, 760-767.

Michel, A.D., Loury, D.N., Whiting, R.L., 1989. Identification of a single alpha 1-adrenoceptor corresponding to the alpha 1A-subtype in rat submaxillary gland. *Br J Pharmacol* 98, 883-889.

Uhlen, S., Dambrova, M., Nasman, J., Schioth, H.B., Gu, Y., Wikberg-Matsson, A., Wikberg, J.E., 1998. [3H]RS79948-197 binding to human, rat, guinea pig and pig alpha2A-, alpha2B- and alpha2C-adrenoceptors. Comparison with MK912, RX821002, rauwolscine and yohimbine. *Eur J Pharmacol* 343, 93-101.

Uhlen, S., Porter, A.C., Neubig, R.R., 1994. The novel alpha-2 adrenergic radioligand [3H]-MK912 is alpha-2C selective among human alpha-2A, alpha-2B and alpha-2C adrenoceptors. *J Pharmacol Exp Ther* 271, 1558-1565.
