# Supplementary material for: Peripheral α2-β1 adrenergic interactions mediate the ghrelin response to brain urocortin 1 in rats
Source: PubMed Central journal article supplement — Psychoneuroendocrinology. Author manuscript; Available in PMC 2018 May 9. (PMC5942202; doi:10.1016/j.psyneuen.2014.09.003), 2014-09-16
Supplement: NIHMS964516-supplement-s3.pdf [file NIHMS964516-supplement-s3.pdf]

## Supplementary Table S1

Effects of ICV UCN1 administration on *c-fos* mRNA expression in specific brain nuclei

| Brain region | Mean number of <i>c-fos</i> -positive cells/section <sup>a</sup> |                   |                 |
|--------------|------------------------------------------------------------------|-------------------|-----------------|
|              | PBS <sup>b</sup>                                                 | UCN1 <sup>b</sup> | <i>P</i> -value |
| PVN          | 9.1 ± 3.1                                                        | 141.6 ± 18.1      | <0.01           |
| VMH          | 0.4 ± 0.4                                                        | 29.3 ± 6.0        | <0.05           |
| LC           | 0 ± 0                                                            | 6.3 ± 3.3         | <0.05           |
| NTS          | 1.0 ± 0.6                                                        | 37.5 ± 2.4        | <0.001          |
| DMV          | 1.0 ± 0.7                                                        | 1.9 ± 0.6         | NS              |
| RVLM         | 0.8 ± 0.5                                                        | 13.1 ± 3.1        | <0.05           |

<sup>a</sup>Each value is presented as the mean ± SEM (n = 4). Each positive cell was counted unilaterally in PVN, paraventricular nucleus; LC, locus ceruleus; VMH, ventromedial hypothalamus; NTS, nucleus of the solitary tract; DMV, dorsal motor nucleus of the vagus; and RVLM, rostral ventrolateral medulla sections and averaged bilaterally for 1 section. *P*-values are derived from the Aspin-Welch *t*-test.

<sup>b</sup>Rats were injected ICV with either phosphate buffer saline (PBS) or urocortin 1 (UCN1, 300 pmol/rat) and euthanized 1-h later. The brain was processed for *c-fos* mRNA detected by *in situ* hybridization in specific brain nuclei.
