# Supplementary material for: Peripheral α2-β1 adrenergic interactions mediate the ghrelin response to brain urocortin 1 in rats
Source: PubMed Central journal article supplement — Psychoneuroendocrinology. Author manuscript; Available in PMC 2018 May 9. (PMC5942202; doi:10.1016/j.psyneuen.2014.09.003), 2014-09-16
Supplement: NIHMS964516-supplement-s4.pdf [file NIHMS964516-supplement-s4.pdf]

## Supplementary Table S2

Binding inhibitory activity (IC<sub>50</sub> values) of selective components of rikkunshito (RKT) on  $\alpha$ - and  $\beta$ - adrenergic receptor (AR) subtypes

| RKT components                      | $\alpha$ -AR <sup>a</sup> |            |            |            |            |            |            | $\beta$ -AR <sup>a</sup> |            |            |
|-------------------------------------|---------------------------|------------|------------|------------|------------|------------|------------|--------------------------|------------|------------|
|                                     | 1                         |            |            | 2          |            |            |            | 1                        | 3          |            |
|                                     | A                         | B          | NS         | A          | B          | C          | NS         |                          |            |            |
| <i>Glycyrrhizae Radix</i>           | glycycomarin              | 19.6 ± 1.0 | 11.7 ± 3.3 |            | 5.2 ± 0.7  | 39.4 ± 3.3 | 14.5 ± 0.3 | –                        | 24.6 ± 0.6 | 10.4 ± 2.4 |
| <i>Zingiberis Rhizoma</i>           | 6-shogaol                 | –          | –          | –          | 24.7 ± 2.4 | –          | –          | –                        | –          | –          |
|                                     | 8-shogaol                 | –          | –          | –          | 5.7 ± 0.8  | –          | 6.1 ± 0.5  | –                        | –          | –          |
|                                     | 10-gingerol               | 22.9 ± 1.4 |            | –          | 5.4 ± 0.2  | 30.9 ± 1.9 | 6.6 ± 0.8  | –                        | 25.1 ± 0.9 | 9.8 ± 0.6  |
| <i>Aurantii Nobilis pericarpium</i> | Heptamethoxyflavone       | 12.2 ± 1.8 | –          | 17.1 ± 2.9 | –          | –          | –          | –                        | –          | –          |
|                                     | synephrine                | –          | –          | –          | –          | –          | –          | 11.2 ± 1.2               | –          | –          |
| <i>Atractylodis Lanceae Rhizoma</i> | Eudesmol                  | 48.8 ± 1.2 | –          | –          | 37.2 ± 4.4 | –          | –          | –                        | –          | –          |

<sup>a</sup>Binding - inhibitory activities of selective RKT components were performed using human recombinant ARs ( $\alpha_2$ ,  $\beta$ ) or rat tissue ARs ( $\alpha_1$ ) by radioligand binding assay. Each value indicates the mean ± SE of 3 samples as  $\mu$ mol. Seven crude rikkunshito components responded to a single AR dose at 100  $\mu$ M with inhibitory activity of at least 70% were performed.

(–) : NS (Indicates no significant: more than 100  $\mu$ mol/L as IC<sub>50</sub> values.)
