# Supplementary material for: Peripheral α2-β1 adrenergic interactions mediate the ghrelin response to brain urocortin 1 in rats
Source: PubMed Central journal article supplement — Psychoneuroendocrinology. Author manuscript; Available in PMC 2018 May 9. (PMC5942202; doi:10.1016/j.psyneuen.2014.09.003), 2014-09-16
Supplement: NIHMS964516-supplement-s5.pdf [file NIHMS964516-supplement-s5.pdf]

Supplementary Fig. S1

PBS

UCN1

PVN

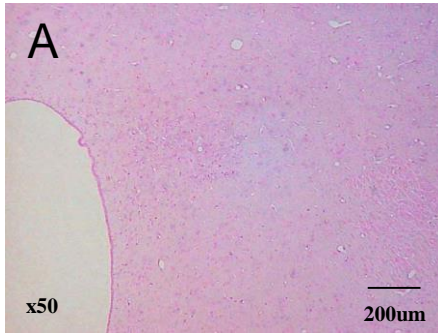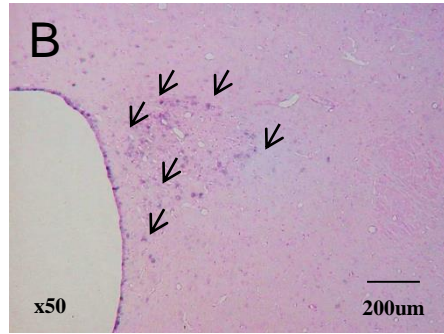

VMH

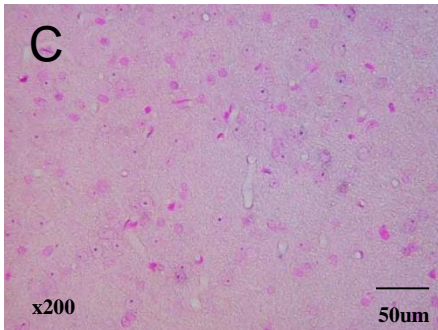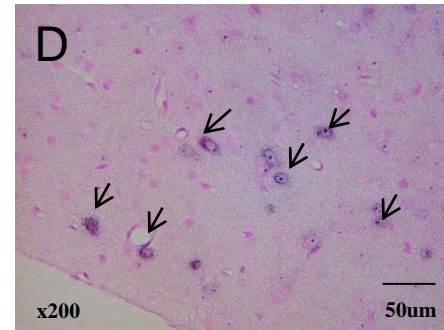

NTS<sup>(a)</sup>/  
DMV<sup>(b)</sup>

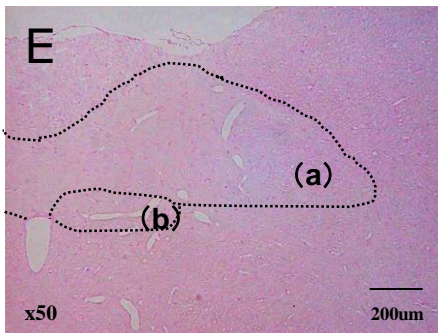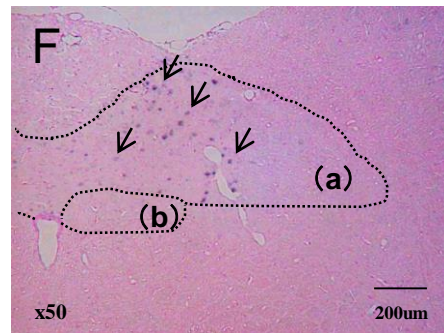

RVLM

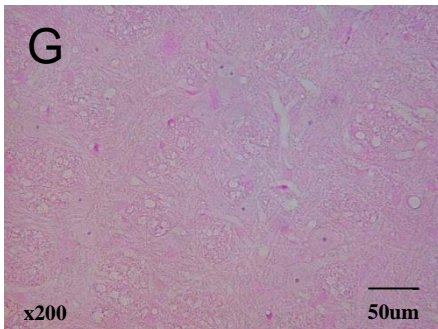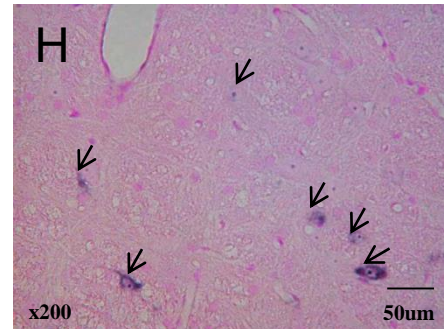

Photomicrographs of *c-fos* mRNA expression in the hypothalamus, dosal vagal complex (DVC) and medulla oblongata 1h-after ICV injection of PBS (A,C,E, and G) or UCN1 (300 pmol/rat, B,D,F and H) in rats. PBS: phosphate buffered saline; UCN1: urocortin 1; PVN, paraventricular nucleus; VMH, ventromedial hypothalamus; NTS, nucleus of the solitary tract; DMV, dorsal motor nucleus of the vagus; and RVLM, rostral ventrolateral medulla.

↙: *c-fos* mRNA positive cells
