# Supplementary material for: Peripheral α2-β1 adrenergic interactions mediate the ghrelin response to brain urocortin 1 in rats
Source: PubMed Central journal article supplement — Psychoneuroendocrinology. Author manuscript; Available in PMC 2018 May 9. (PMC5942202; doi:10.1016/j.psyneuen.2014.09.003), 2014-09-16
Supplement: NIHMS964516-supplement-s6.pdf [file NIHMS964516-supplement-s6.pdf]

## Supplementary Fig. S2

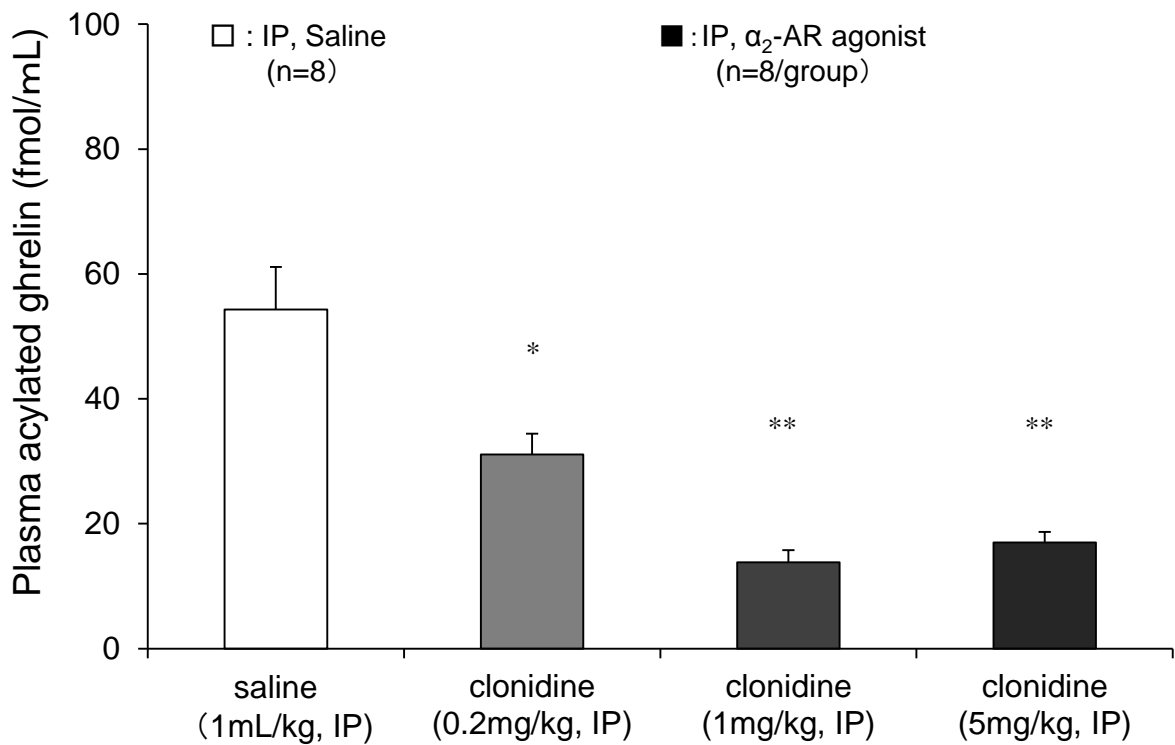

Effects of  $\alpha_2$ -adrenergic receptor agonist (clonidine: 0.2, 1 or 5mg/kg, IP) on plasma acyated ghrelin levels in native rats. Columns express means  $\pm$  SEM (n=8/group). \*p<0.05, \*\*p<0.01 vs saline administration by steel's test.
