# Supplementary material for: Peripheral α2-β1 adrenergic interactions mediate the ghrelin response to brain urocortin 1 in rats
Source: PubMed Central journal article supplement — Psychoneuroendocrinology. Author manuscript; Available in PMC 2018 May 9. (PMC5942202; doi:10.1016/j.psyneuen.2014.09.003), 2014-09-16
Supplement: NIHMS964516-supplement-s7.pdf [file NIHMS964516-supplement-s7.pdf]

# Supplementary Fig. S3

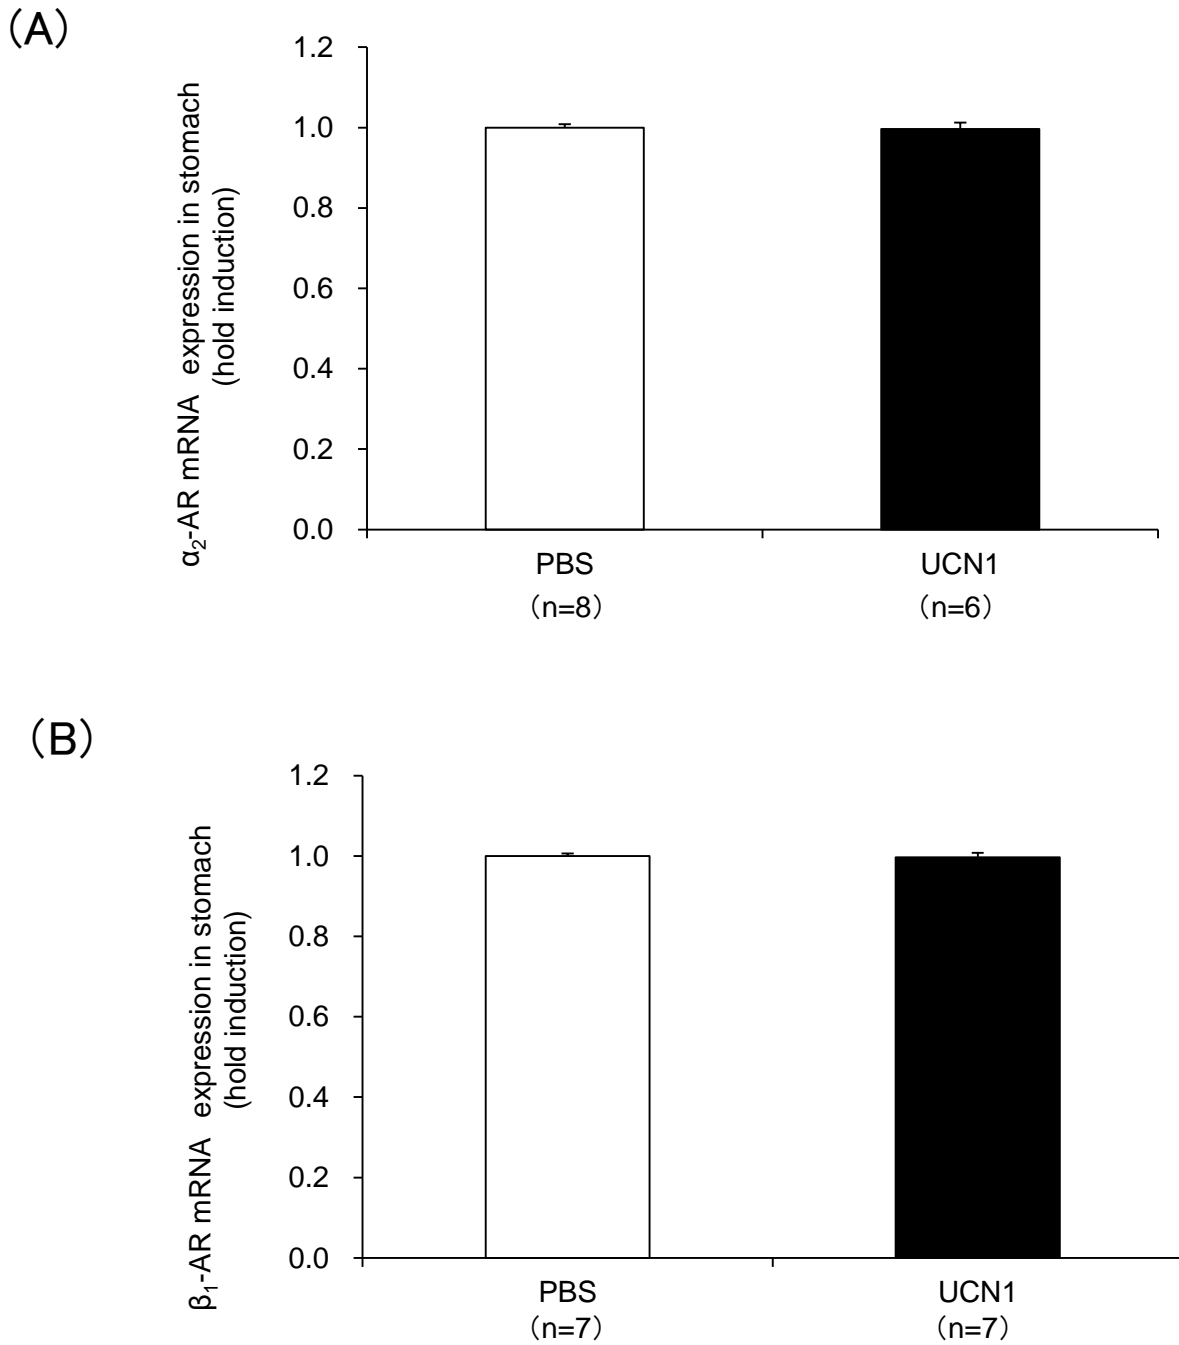

ICV UCN1 did not influence  $\alpha_2$ -AR and  $\beta_1$ -AR mRNA expression in rat stomach monitored by real-time RT-PCR. mRNA 2h after ICV injection of vehicle (phosphate buffer saline, PBS) or UCN1 (300 pmol/rat). Relative quantity of glyceraldehyde-3-phosphate dehydrogenase (GAPDH) mRNA. Columns express means  $\pm$ SE (n=6-8/group).
