# Supplementary material for: Peripheral α2-β1 adrenergic interactions mediate the ghrelin response to brain urocortin 1 in rats
Source: PubMed Central journal article supplement — Psychoneuroendocrinology. Author manuscript; Available in PMC 2018 May 9. (PMC5942202; doi:10.1016/j.psyneuen.2014.09.003), 2014-09-16
Supplement: NIHMS964516-supplement-s8.pdf [file NIHMS964516-supplement-s8.pdf]

## Supplementary Fig. S4

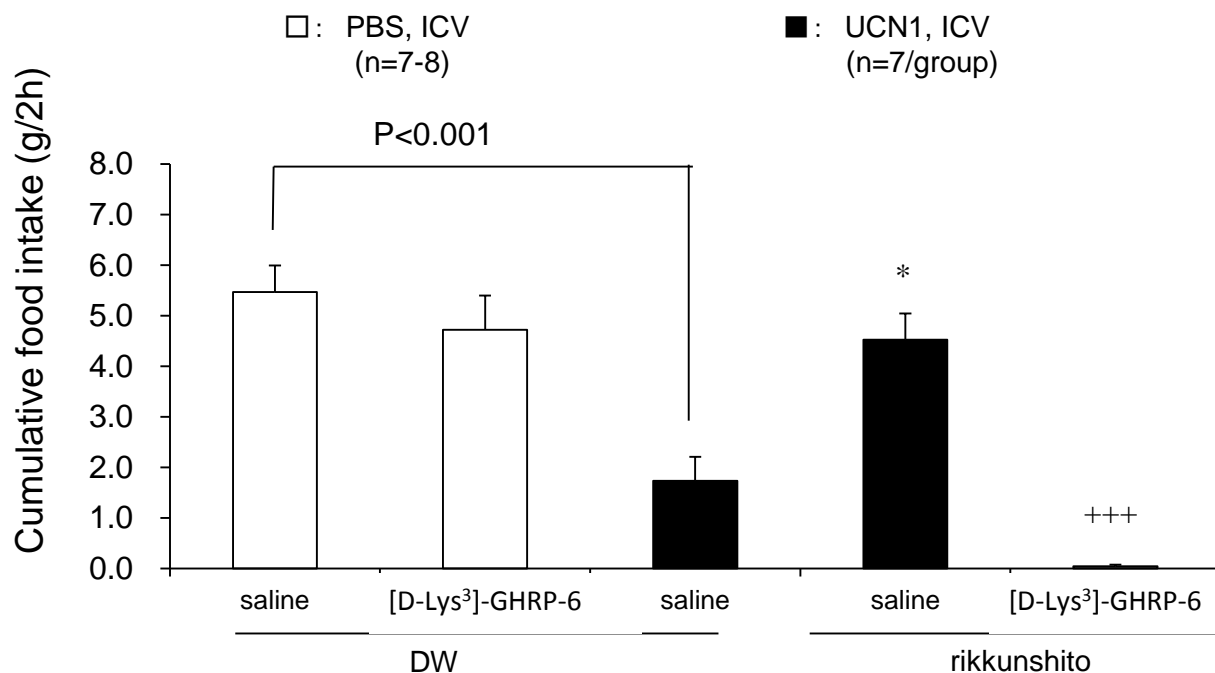

Effects of oral administration of rikkunshito alone or combination with ghrelin receptor antagonist ([D-Lys<sup>3</sup>]-GHRP-6) on decreased food intakes 2-h after ICV UCN1 administration. Distilled water (DW) or rikkunshito (1000mg/kg) administered orally to rats 1-h before ICV administration of PBS or UCN1 (300pmol/rats). Saline or [D-Lys<sup>3</sup>]-GHRP-6 (3.7mg/kg) was administered intravenously into the tail veins of rats after ICV PBS or UCN1. Columns express means  $\pm$  SEM (n=7-8/group). Significance was determined using Steel's-test *post hoc* analysis following one-way ANOVA analysis. \*P < 0.05 compared with the DW/UCN1/saline group. +++P < 0.001 vs. the UCN1/rikkunshito group. Significance between PBS and UCN1 was determined using the student's t-test.
